# Supplementary material
Source: PubMed Central journal article supplement (PMC3038728)
Supplement: 1010241108_pnas.201010241SI.pdf [file 1010241108_pnas.201010241SI.pdf]

# Supporting Information

## Gibson and Gurmu 10.1073/pnas.1010241108

**Table S1. Description of study sample**

|                                     | Inheritor male <i>n</i> = 520 | Redistribution male <i>n</i> = 411 | Female <i>n</i> = 1,166                   |
|-------------------------------------|-------------------------------|------------------------------------|-------------------------------------------|
| Age                                 | 34.36 ± 10.67                 | 55.34 ± 12.81                      | 37.48 ± 13.98                             |
| Family (sibship) size               | 10.66 ± 5.05                  | 9.42 ± 5.65                        | 10.28 ± 5.24                              |
| Birth order, %                      |                               |                                    |                                           |
| 1                                   | 21.1                          | 25.4                               | 11                                        |
| 2–3                                 | 29.3                          | 32.4                               | 47.6                                      |
| 4–6                                 | 28                            | 24.3                               | 36.9                                      |
| 7+                                  | 21.5                          | 18                                 | 4.5                                       |
| Sibling configuration               |                               |                                    |                                           |
| Older brothers                      | 1.49 ± 1.69                   | 1.51 ± 1.93                        | 1.22 ± 1.37                               |
| Younger brothers                    | 2.46 ± 2.39                   | 2.26 ± 2.55                        | 1.08 ± 1.21                               |
| Older sisters                       | 1.50 ± 2.05                   | 1.20 ± 1.69                        | 1.14 ± 1.33                               |
| Younger sisters                     | 2.34 ± 2.08                   | 2.27 ± 2.37                        | 1.15 ± 1.29                               |
| Land size (hectares)*               | 1.23 ± 0.06                   | 1.89 ± 0.06                        | NA                                        |
| Agricultural yield (quintals)*      | 16.40 ± 0.89                  | 21.07 ± 0.99                       | NA                                        |
| Age at first marriage*              | 21.8 ± 3.62                   | 22.4 ± 4.92                        | 16.26 ± 2.07                              |
| Marriage payments (Ethiopian birr)* | 1165 ± 185 (75 USD)           | 1375 ± 227 (86 USD)                | 66.2% with dowry 549.56 ± 749.68 (34 USD) |
| Surviving offspring*                | 4.40 ± 0.13                   | 6.01 ± 0.15                        | 4.49 ± 2.56                               |

\*Adjusted for age.

**Table S2. Competition for productive land**

|                        | Inheritor male <i>n</i> = 520      |          | Redistribution recipient male <i>n</i> = 411 |          |
|------------------------|------------------------------------|----------|----------------------------------------------|----------|
|                        | Total crop yield in quintals (GLM) |          |                                              |          |
|                        | Coefficient ± SE                   | <i>P</i> | Coefficient ± SE                             | <i>P</i> |
| <b>Model 1</b>         |                                    |          |                                              |          |
| Intercept              | 7.88 ± 2.85                        | 0.006    | 10.62 ± 5.19                                 | 0.042    |
| Age                    | 0.002 ± 0.07                       | 0.971    | 0.02 ± 0.08                                  | 0.815    |
| Father's wives         | 0.27 ± 0.65                        | 0.682    | 0.20 ± 1.16                                  | 0.861    |
| Land size              | 7.24 ± 0.74                        | 0.000    | 4.74 ± 0.67                                  | 0.000    |
| Sib sex ratio at birth | −0.47 ± 0.49                       | 0.337    | 1.04 ± 0.80                                  | 0.197    |
| Family size            | 0.07 ± 0.16                        | 0.680    | −0.26 ± 0.23                                 | 0.253    |
| Birth order            | −0.23 ± 0.85                       | 0.208    | 0.39 ± 0.29                                  | 0.175    |
| <b>Model 2</b>         |                                    |          |                                              |          |
| Older brothers         | −0.77 ± 0.40                       | 0.076    | 0.01 ± 0.69                                  | 0.987    |
| Older sisters          | −0.33 ± 0.33                       | 0.328    | −0.93 ± 0.59                                 | 0.100    |

**Table S3. Competition for marriage and reproduction**

|                                            | Inheritor male $n = 520$       |          | Redistribution recipient male $n = 411$ |          | Female $n = 1,166$   |          |
|--------------------------------------------|--------------------------------|----------|-----------------------------------------|----------|----------------------|----------|
|                                            | Age at marriage in years (GLM) |          |                                         |          |                      |          |
|                                            | Coefficient $\pm$ SE           | <i>P</i> | Coefficient $\pm$ SE                    | <i>P</i> | Coefficient $\pm$ SE | <i>P</i> |
| <b>Model 1</b>                             |                                |          |                                         |          |                      |          |
| Intercept                                  | 19.11 $\pm$ 0.72               | 0.000    | 17.05 $\pm$ 1.32                        | 0.000    | 17.35 $\pm$ 0.26     | 0.000    |
| Age                                        | 0.10 $\pm$ 0.02                | 0.000    | 0.11 $\pm$ 0.02                         | 0.000    | -0.03 $\pm$ 0.00     | 0.000    |
| Father's wives                             | -0.16 $\pm$ 0.16               | 0.337    | -0.43 $\pm$ 0.30                        | 0.145    | -0.09 $\pm$ 0.15     | 0.543    |
| Land size                                  | -0.78 $\pm$ 0.29               | 0.008    | -0.31 $\pm$ 0.29                        | 0.282    | -0.03 $\pm$ 0.07     | 0.696    |
| Sib sex ratio                              | 0.06 $\pm$ 0.13                | 0.639    | 0.02 $\pm$ 0.20                         | 0.914    | 0.00 $\pm$ 0.91      | 0.912    |
| Family size                                | -0.02 $\pm$ 0.04               | 0.680    | 0.06 $\pm$ 0.06                         | 0.312    | -0.00 $\pm$ 0.04     | 0.817    |
| Birth order                                | 0.06 $\pm$ 0.05                | 0.188    | -0.02 $\pm$ 0.07                        | 0.841    | -0.02 $\pm$ 0.06     | 0.708    |
| <b>Model 2</b>                             |                                |          |                                         |          |                      |          |
| Older bros                                 | 0.30 $\pm$ 0.10                | 0.007    | 0.06 $\pm$ 0.17                         | 0.746    | -0.07 $\pm$ 0.06     | 0.254    |
| Older sisters                              | -0.01 $\pm$ 0.10               | 0.662    | 0.12 $\pm$ 0.20                         | 0.921    | -0.03 $\pm$ 0.06     | 0.682    |
| <b>Marriage payments in Ethiopian birr</b> |                                |          |                                         |          |                      |          |
|                                            | GLM                            | <i>P</i> | GLM                                     | <i>P</i> | LOG                  | <i>P</i> |
| <b>Model 1</b>                             |                                |          |                                         |          |                      |          |
| Intercept                                  | 2774 $\pm$ 368                 | 0.000    | 2118 $\pm$ 394                          | 0.000    | -1.97 $\pm$ 0.29     | 0.000    |
| Age                                        | -38.50 $\pm$ 9.01              | 0.000    | -16.90 $\pm$ 5.85                       | 0.004    | 0.05 $\pm$ 0.01      | 0.000    |
| Father's wives                             | 12.21 $\pm$ 81.84              | 0.881    | 87.85 $\pm$ 89.42                       | 0.327    | 0.01 $\pm$ 0.17      | 0.944    |
| Land size                                  | -87.25 $\pm$ 155.03            | 0.574    | -56.26 $\pm$ 93.26                      | 0.547    | 0.07 $\pm$ 0.08      | 0.416    |
| Sib sex ratio                              | 69.71 $\pm$ 63.22              | 0.271    | -77.91 $\pm$ 58.19                      | 0.182    | -0.21 $\pm$ 0.09     | 0.016    |
| Family size                                | 49.42 $\pm$ 21.04              | 0.019    | 11.97 $\pm$ 17.23                       | 0.488    | -0.02 $\pm$ 0.04     | 0.695    |
| Birth order                                | -24.38 $\pm$ 25.17             | 0.333    | -28.24 $\pm$ 21.50                      | 0.190    | 0.25 $\pm$ 0.07      | 0.000    |
| <b>Model 2</b>                             |                                |          |                                         |          |                      |          |
| Older bros                                 | -182.85 $\pm$ 55               | 0.001    | -44.72 $\pm$ 53.38                      | 0.403    | 0.20 $\pm$ 0.07      | 0.002    |
| Older sisters                              | 147.96 $\pm$ 52.55             | 0.005    | 61.95 $\pm$ 72.47                       | 0.916    | 0.14 $\pm$ 0.90      | 0.136    |
| <b>No. of surviving offspring (GLM)</b>    |                                |          |                                         |          |                      |          |
|                                            | Coefficient $\pm$ SE           | <i>P</i> | Coefficient $\pm$ SE                    | <i>P</i> | Coefficient $\pm$ SE | <i>P</i> |
| <b>Model 1</b>                             |                                |          |                                         |          |                      |          |
| Intercept                                  | -1.59 $\pm$ 0.38               | 0.000    | 1.59 $\pm$ 0.85                         | 0.061    | -0.13 $\pm$ 0.25     | 0.597    |
| Age                                        | 0.13 $\pm$ 0.01                | 0.000    | 0.07 $\pm$ 0.01                         | 0.000    | 0.09 $\pm$ 0.00      | 0.000    |
| Father's wives                             | 0.07 $\pm$ 0.09                | 0.442    | 0.02 $\pm$ 0.19                         | 0.933    | -0.07 $\pm$ 0.15     | 0.663    |
| Land size                                  | 0.43 $\pm$ 0.16                | 0.006    | 0.87 $\pm$ 0.18                         | 0.000    | 0.56 $\pm$ 0.07      | 0.000    |
| Sib sex ratio                              | -0.05 $\pm$ 0.07               | 0.533    | -0.18 $\pm$ 0.13                        | 0.164    | -0.21 $\pm$ 0.15     | 0.009    |
| Family size                                | 0.05 $\pm$ 0.02                | 0.035    | 0.04 $\pm$ 0.04                         | 0.278    | 0.00 $\pm$ 0.04      | 0.894    |
| Birth order                                | -0.04 $\pm$ 0.03               | 0.084    | 0.01 $\pm$ 0.05                         | 0.812    | 0.19 $\pm$ 0.06      | 0.002    |
| <b>Model 2</b>                             |                                |          |                                         |          |                      |          |
| Older bros                                 | -0.00 $\pm$ 0.06               | 0.837    | 0.14 $\pm$ 0.11                         | 0.198    | 0.11 $\pm$ 0.06      | 0.060    |
| Older sisters                              | -0.03 $\pm$ 0.06               | 0.150    | 0.07 $\pm$ 0.09                         | 0.404    | 0.07 $\pm$ 0.06      | 0.275    |
| <b>Model 3</b>                             |                                |          |                                         |          |                      |          |
| First born                                 | Reference value                |          | Reference value                         |          | Reference value      |          |
| All later born                             | -0.42 $\pm$ 0.20               | 0.038    | 0.27 $\pm$ 0.34                         | 0.439    | 0.32 $\pm$ 0.21      | 0.131    |
